# Supplementary material
Source: MDPI journal article supplement (https://www.mdpi.com/2073-4352/10/5/382)
Supplement: s1 [file s1]

Archive with 2 entries (2 files):
- Supplementary materials_final.pdf
- video S1 Video of the AUC raw data of a band forming experiment for the in-situ nucleation of gold clusters obtained from the multiwavelength AUC.avi
